# Supplementary material for: Combining information from genome-wide association and multi-tissue gene expression studies to elucidate factors underlying genetic variation for residual feed intake in Australian Angus cattle
Source: PubMed Central journal article supplement (PMC6898931; doi:10.1186/s12864-019-6270-4), 2019-12-06
Supplement: 12864_2019_6270_MOESM2_ESM.pdf [file 12864_2019_6270_MOESM2_ESM.pdf]

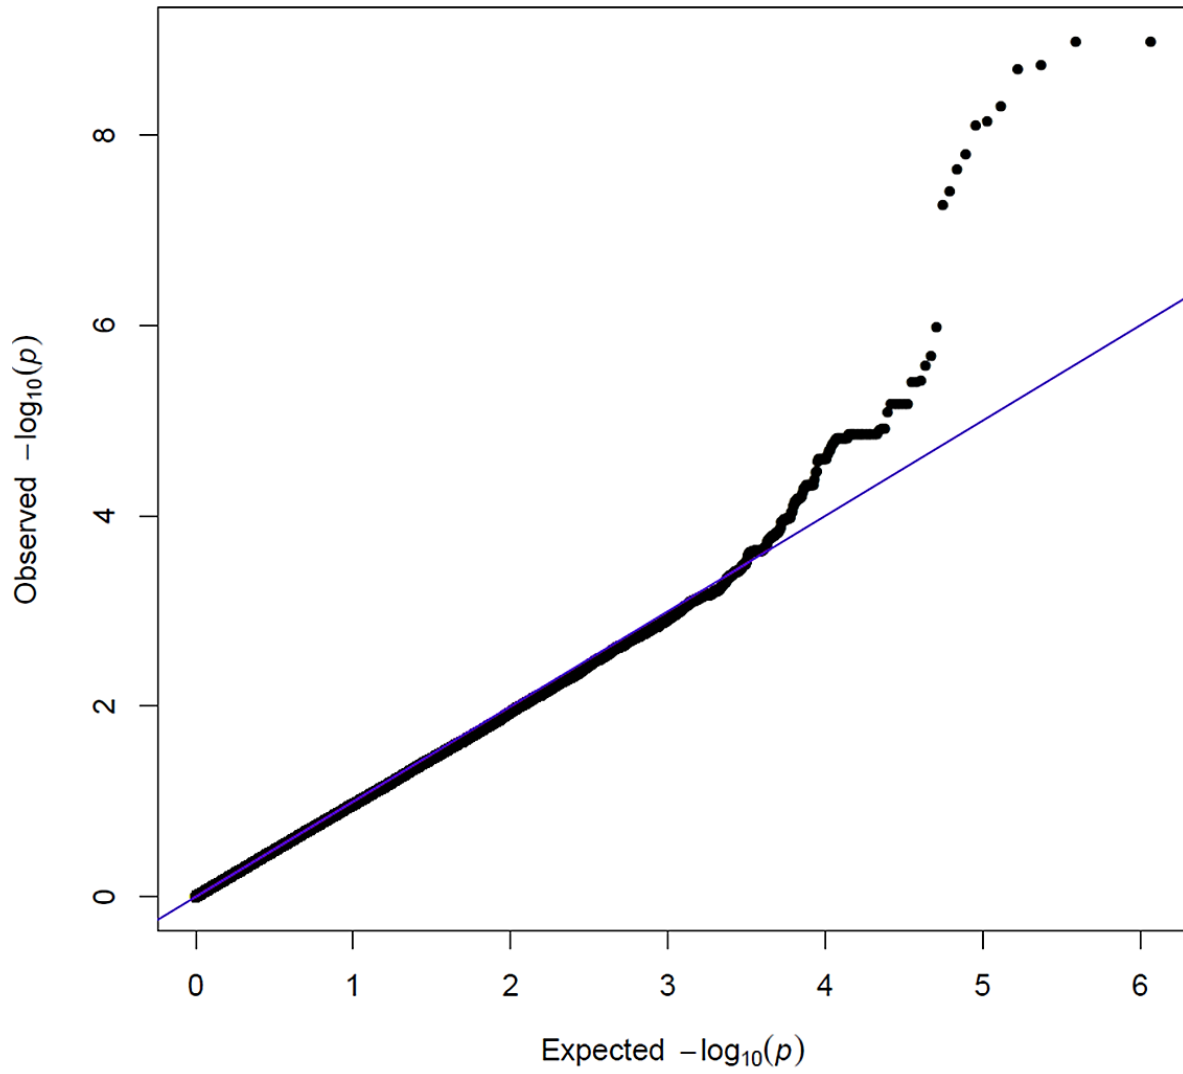

**Figure S1.** Q-Q plot of p-values for the GWAS of RFI.
